# Supplementary material for: Health Behaviors in Austrian Apprentices and School Students during the COVID-19 Pandemic
Source: MDPI journal article supplement (doi:10.3390/ijerph19031049), 2022-01-18
Supplement: s1 [file s1]

**Table S1.** Percentage of respondents in each vaccine willingness category, according to each of the health behaviors.

|                         | Definitely | Probably    | Rather not  | Definitely not | I don't know | <i>p</i> -value   |
|-------------------------|------------|-------------|-------------|----------------|--------------|-------------------|
| <i>Smoking</i>          |            |             |             |                |              |                   |
| Never                   | 42.6%      | 17.2%       | 12.5%       | 12.5%          | 15.1%        | <i>p</i> = 0.08   |
| Less than 1x per week   | 43.1%      | 23.6%       | 12.5%       | 13.9%          | 6.9%         |                   |
| 1x or more per week     | 52.4%      | 16.7%       | 9.5%        | 11.9%          | 9.5%         |                   |
| Daily                   | 26.5%      | 15.1%       | 16%         | 25.2%          | 17.2%        |                   |
| <i>Alcohol</i>          |            |             |             |                |              |                   |
| None                    | 36.4%      | 17.3%       | 13.1%       | 16.6%          | 16.6%        | <i>p</i> = 0.12   |
| 1-2 days                | 36.7%      | 19.2%       | 12.6%       | 16.8%          | 14.7%        |                   |
| 3-5 days                | 47.2%      | 15.6%       | 16.5%       | 10.1%          | 10.6%        |                   |
| 6-9 days                | 40%        | 19.1%       | 13.6%       | 9.1%           | 18.2%        |                   |
| 10-19 days              | 47.6%      | 14.3%       | 6.3%        | 17.5%          | 14.3%        |                   |
| 20-29 days              | 48.3%      | 6.9%        | 6.9%        | 20.7%          | 17.2%        |                   |
| 30 days                 | 18.8%      | 12.5%       | 12.5%       | 50%            | 6.3%         |                   |
| <i>Cannabis</i>         |            |             |             |                |              |                   |
| None                    | 39.7%      | 17.3%       | 13.1%       | 14.9%          | 14.8%        | <i>p</i> = 0.85   |
| 1-2 days                | 39.2%      | 17.6%       | 13.7%       | 17.6%          | 11.8%        |                   |
| 3-5 days                | 50%        | 21.4%       | 7.1%        | 7.1%           | 14.3%        |                   |
| 6-9 days                | 50%        | 16.7%       | 16.7%       | 16.7%          | 0%           |                   |
| 10-19 days              | 44.4%      | 11.1%       | 0%          | 5.6%           | 38.9%        |                   |
| 20-29 days              | 33.3%      | 16.7%       | 11.1%       | 22.2%          | 16.7%        |                   |
| 30 days                 | 20%        | 6.7%        | 33.3%       | 40%            | 0%           |                   |
| <i>Exercise</i>         |            |             |             |                |              |                   |
| Mean days per week (SD) | 2.12 (1.5) | 2.23 (1.64) | 2.64 (1.93) | 2.94 (2.28)    | 2.82 (2.24)  | <i>p</i> = 0.42   |
| <i>Health status</i>    |            |             |             |                |              |                   |
| Excellent               | 42.6%      | 15.8%       | 11.9%       | 17.4%          | 12.3%        | <i>p</i> = 0.87   |
| Good                    | 38%        | 20.5%       | 12.2%       | 13%            | 16.3%        |                   |
| Quite good              | 39.9%      | 14.1%       | 14.9%       | 17.3%          | 13.7%        |                   |
| Bad                     | 36.9%      | 11.9%       | 17.9%       | 14.3%          | 19%          |                   |
| <i>Group</i>            |            |             |             |                |              |                   |
| Apprentice              | 25.75%     | 15.8%       | 15.3%       | 23.45%         | 19.7%        | <i>p</i> < 0.0001 |
| School student          | 53.46%     | 18.5%       | 11%         | 7.1%           | 9.9%         |                   |
